# Supplementary material for: Time Trends of Greenspaces, Air Pollution, and Asthma Prevalence among Children and Adolescents in India
Source: MDPI journal article supplement (doi:10.3390/ijerph192215273), 2022-11-18
Supplement: s1 [file s1]

**Table S1. Correlations and p-values between the air pollutants and meteorological variables**

|                         | PM <sub>2.5</sub> | PM <sub>10</sub> | SO <sub>2</sub> | NO <sub>2</sub> | O <sub>3</sub> | Maximum temperature | Relative humidity | Average Annual Rainfall |
|-------------------------|-------------------|------------------|-----------------|-----------------|----------------|---------------------|-------------------|-------------------------|
| PM <sub>2.5</sub>       | 1                 |                  |                 |                 |                |                     |                   |                         |
| PM <sub>10</sub>        | <b>0.809</b>      | 1                |                 |                 |                |                     |                   |                         |
|                         | 0.000             |                  |                 |                 |                |                     |                   |                         |
| SO <sub>2</sub>         | <b>0.230</b>      | <b>0.330</b>     | 1               |                 |                |                     |                   |                         |
|                         | 0.041             | 0.002            |                 |                 |                |                     |                   |                         |
| NO <sub>2</sub>         | <b>0.494</b>      | <b>0.535</b>     | <b>0.332</b>    | 1               |                |                     |                   |                         |
|                         | 0.000             | 0.000            | 0.001           |                 |                |                     |                   |                         |
| O <sub>3</sub>          | 0.068             | 0.049            | 0.148           | -0.067          | 1              |                     |                   |                         |
|                         | 0.683             | 0.747            | 0.148           | 0.662           |                |                     |                   |                         |
| Maximum temperature     | 0.119             | -0.069           | 0.172           | 0.206           | -0.091         | 1                   |                   |                         |
|                         | 0.284             | 0.530            | 0.111           | 0.055           | 0.548          |                     |                   |                         |
| Relative humidity       | -0.192            | <b>-0.236</b>    | <b>-0.284</b>   | <b>-0.246</b>   | <b>-0.314</b>  | <b>-0.298</b>       | 1                 |                         |
|                         | 0.0825            | 0.0294           | 0.0077          | 0.0217          | 0.0353         | 0.0043              |                   |                         |
| Average Annual Rainfall | <b>-0.4049</b>    | <b>-0.4787</b>   | <b>-0.3280</b>  | <b>-0.3079</b>  | <b>-0.3580</b> | 0.0063              | <b>0.4687</b>     | 1                       |
|                         | 0.0002            | 0.0000           | 0.0019          | 0.0037          | 0.0157         | 0.9530              | 0.0000            |                         |

Note: Data describes the Correlation matrix for the air pollutants and the meteorological factors. The corresponding p values are reported below each correlation co-efficient values. Significant p values that is  $p < 0.05$  are made bold. The variables are continuous represent PM<sub>2.5</sub>, particulate matter of diameter 2.5µm or less; PM<sub>10</sub>, particulate matter of diameter 10µm or less; NO<sub>2</sub>, nitrogen dioxide; SO<sub>2</sub>, sulfur dioxide; and, O<sub>3</sub>, ozone measured as µgm/m<sup>3</sup>; maximum temperature in degree Celsius; Relative Humidity in percentage; Average Annual Rainfall in millimeter.

**Table S2. The estimates for asthma prevalence rates and NDVI with each of the air pollutants concentrations for the year 2005, 2011, and 2017.**

| <b>Asthma Prevalence Rates (95% CI)</b>         |                   |                   |                   |  |
|-------------------------------------------------|-------------------|-------------------|-------------------|--|
|                                                 | 2005              | 2011              | 2017              |  |
| <b>NDVI continuous</b>                          |                   |                   |                   |  |
| Unadjusted                                      | 1.44 (1.35, 1.54) | 1.95 (1.83, 2.09) | 1.05 (0.97, 1.15) |  |
| Particulate matter <2.5µgm (PM <sub>2.5</sub> ) | 1.45 (1.36, 1.54) | 1.92 (1.80, 2.05) | 1.17 (1.05, 1.30) |  |
| Particulate matter <10µgm (PM <sub>10</sub> )   | 1.39 (1.30, 1.49) | 1.24 (1.15, 1.34) | 1.12 (1.02, 1.22) |  |
| Sulfur dioxide (SO <sub>2</sub> )               | 1.41 (1.31, 1.52) | 1.91 (1.79, 2.04) | 1.06 (0.97, 1.15) |  |
| Nitrogen dioxide(NO <sub>2</sub> )              | 1.50 (1.39, 1.61) | 1.95 (1.81, 2.10) | 1.11 (1.01, 1.20) |  |
| Ozone (O <sub>3</sub> )                         | 2.01 (1.74, 2.33) | 1.24 (0.99, 1.55) | 0.80 (0.67, 0.94) |  |

Note: The model estimated the association between continuous NDVI and asthma prevalence rate for 2005, 2011 and 2017, adjusting for each air pollutant PM<sub>2.5</sub>, PM<sub>10</sub>, NO<sub>2</sub>, SO<sub>2</sub> and O<sub>3</sub> concentration. The asthma prevalence rates and 95% confidence intervals (95% CI) are shown. NDVI: normalized difference vegetation index. All models are adjusted for maximum temperature, relative humidity, average annual rainfall, social progress index, and population.
